# Supplementary material
Source: Research Square preprint supplement (doi:10.21203/rs.3.rs-9555784/v1)
Supplement: Supplementary file 3 [file 895be9e397c61d32b7b671cd.pdf]

| Target          | Allele       | Deletion size | Position and Original Sequence                                                   | Deleted Sequence                                                     |
|-----------------|--------------|---------------|----------------------------------------------------------------------------------|----------------------------------------------------------------------|
| CCT9            | cct9-1       | [-11]         | 022 TGTCTTCTGTCAACGACGCGTCACCGACGCGG<br>022 TGTCTTCTG-----TCACCGACGCGG           | TCACCGACGCG                                                          |
|                 |              | [-5]          | 273 GAACCATCCGAGGTCGAGCCGGCCTGGTTCGTA<br>273 GAACCAT-----GTCGAGCCGGCCTGGTTCGTA   | CCGAG                                                                |
|                 | cct9-2       | [-8]          | 022 TGTCTTCTGTGCGGGACGACGTTCACCGACGCGG<br>022 TGTCTTCTG-----CGTTCACCGACGCGG      | CGGGAGCA                                                             |
|                 | cct9-3       | [-11]         | 014 TCCTTCTGCGGGAGCACGTTCACCGACGCGCGG<br>014 TCCTTCTGCGG-----CCGACGCGGCG         | GAGCACGTTCA                                                          |
|                 | cct9-4       | [-25]         | 243 GGAACCATCCGAGGTCGAGCCGGCCTGGTTCGT<br>243 GGAAC-----CGT                       | CATCCGAGGTC<br>GAGCCGGCCTG<br>GTTCTAGCCC<br>CCCGC                    |
| CCT10           | cct10-1      | [-16]         | 358 GGGGTGGTGGTACTGTGGTGTCCCAAACGGGTG<br>358 GGGGT-----CCCAAACGGGTG              | GGTGGTACTGTG<br>GTGT                                                 |
|                 | cct10-2      | [-14]         | 359 GGGGTGGTGGTACTGTGGTGTCCCAAACGGGTG<br>359 GGGGT-----GTCCCAAACGGGTG            | GGTGGTACTGTG<br>GT                                                   |
|                 | cct10-3      | [-7]          | 359 GGGGTGGTGGTACTGTGGTGTCCCAAACGGGTG<br>359 GGGGTGGTGGTA-----GTCCCAAACGGGTG     | CTGTGGT                                                              |
|                 | cct10-4      | [-6]          | 359 GGGGTGGTGGTACTGTGGTGTCCCAAACGGGTG<br>359 GGGGTGGTGGTAC-----GTCCCAAACGGGTG    | TGTGGT                                                               |
| CCT9 /<br>CCT10 | cct9-5       | [-11]         | 022 TGTCTTCTGTCAACGACGCGTCACCGACGCGG<br>022 TGTCTTCTG-----TCACCGACGCGG           | TCACCGACGCG                                                          |
|                 |              | [-8]          | 272 TTGCTATGAACGGAACCATCCGAGGTCGAGCCG<br>272 TTGCTATGAACGGAACC-----TCGAGCCG      | ATCCGAGG                                                             |
|                 | cct9-6       | [-5]          | 014 TTTTCAGATGTCCTTCTGCGGGAGCACGTTTAC<br>014 TTTTCAGATGTCCTTCTGCGG-----CGTTCAC   | GAGCA                                                                |
|                 |              | [-6]          | 274 TTGCTATGAACGGAACCATCCGAGGTCGAGCCG<br>274 TTGCTATGAACGGAACC-----GGTCGAGCCG    | ATCCGA                                                               |
|                 | cct9-7       | [-6]          | 012 TTTTCAGATGTCCTTCTGCGGGAGCACGTTTAC<br>012 TTTTCAGATGTCCTTCTGC-----ACGTTTAC    | GGGAGC                                                               |
|                 |              | [-15]         | 267 TATGAACGGAACCATCCGAGGTCGAGCCGGCCT<br>267 TATGAACGGA-----CCGGCCT              | CCATCCGAGGT<br>CGAG                                                  |
|                 | cct9-8       | [-26]         | -010 CCCTTTTCAGATGTCCTTCTGCGGGAGCACGTT<br>-010 CCCTT-----TT                      | TTCAGATGTCCT<br>TCTGCGGGAGC<br>ACG                                   |
|                 |              | [-7]          | 273 TTGCTATGAACGGAACCATCCGAGGTCGAGCCG<br>273 TTGCTATGAACGGAACC-----GTCGAGCCG     | ATCCGAG                                                              |
|                 | cct10-3      | [-7]          | 359 GGGGTGGTGGTACTGTGGTGTCCCAAACGGGTG<br>359 GGGGTGGTGGTA-----GTCCCAAACGGGTG     | CTGTGGT                                                              |
|                 | cct10-4      | [-6]          | 359 GGGGTGGTGGTACTGTGGTGTCCCAAACGGGTG<br>359 GGGGTGGTGGTAC-----GTCCCAAACGGGTG    | TGTGGT                                                               |
|                 | cct10-5      | [-10]         | 359 CCGGGGTGGT-----GTCCCAAACGGG<br>359 CCGGGGTGGTGGTACTGTGGTGTCCCAAACGGG         | GTAAGTGGT                                                            |
|                 | Gi1 /<br>Gi2 | gi1-1         | [-16]                                                                            | 0003 TGACATGCTTGGTAGCTCAAGAGCCTGCCAAG<br>0003 TGACATGCTTG-----CCCAAG |
| [-17]           |              |               | 0692 CATGGAATCCTTTAAATTTGAATGTGATCCATT<br>0692 CATGGAATCCT-----CCATT             | TTAAATTTGAATG<br>TGAT                                                |
| [-14]           |              |               | 1248 CAGATGTACTTGCAACATCGCCATTGAGTAGGA<br>1248 CAGATGTACTT-----CAGTAGGA          | GCAACATCGCC<br>ATT                                                   |
| gi2-1           |              | [-9]          | 0006 CACATTTGATTTGACATGCTTGGTAGCTCAAG<br>0006 CACATTTGATTTGACATGCT-----AAG       | TGGTAGCTC                                                            |
|                 |              | [-8]          | 1246 AGATGTACTTGCAACATTTGCCGTTTCAAGACCTC<br>1246 AGATGTACTTGC-----CGTTTCAAGACCTC | AACATTGC                                                             |
| gi2-2           |              | [-8]          | 1246 AGATGTACTTGCAACATTTGCCGTTTCAAGACCTC<br>1246 AGATGTACTTGC-----CGTTTCAAGACCTC | AACATTGC                                                             |

**Supplementary Table 1. All allelic variants generated through gene editing of photoperiod genes recovered at the T1 stage.**

| Gene                       | crRNA Name | Forward Primer       | Reverse Primer        |
|----------------------------|------------|----------------------|-----------------------|
| <b>CCT9</b>                | CCT9-g1    | TGGCGCTACATGCATCTAGG | CGTTCCGGTTCACGGGGAATA |
|                            | CCT9-g2    | GGGTCAGCTAGTCCAGTTCG | CGTTCCGGTTCACGGGGAATA |
| <b>CCT10</b>               | CCT10-g1   | TCCATCCATTTGCTGCACCA | TTCGTCTCTGGCCTTTGCTT  |
|                            | CCT10-g2   | TGCTTCTGCTGTCTCAGTGG | TTCTGCTGCTTCGTCTCTGG  |
| <b>Gigantea1/Gigantea2</b> | Gi1/Gi2-g1 | AGCGTCCCATCTATGATGCG | GAGTAGGGCTTTGGTGGCAT  |
|                            | Gi1/Gi2-g2 | AGCTTCAGTATGTTGGCGCT | TCATTCACGTTGGGGATGCA  |
| <b>Gigantea1/Gigantea2</b> | Gi1/Gi2-g3 | GAGAGATGATGCCCTGGTCG | ATGGCCCTGATGTTGAGTGG  |
|                            |            | TCAGGGAGAAAACGGCTTCC | AAGTTCCTGCATCTGAGGCC  |
| <b>Gigantea1/Gigantea2</b> | Gi1/Gi2-g4 | CGACGAGCATTCCATCGGTA | TTATTCGTCCGGTCCAGGCC  |
|                            |            | TCCTCCATCCTTGGTGAGCT | GGAAGCCGTTTTCTCCCTGA  |

**Supplementary Table 2. Primers used for amplicon prep of T7E1 crRNA mutagenesis assay in protoplast.**

| Primer Name | Primer Sequence (5' – 3')                                                                                                                                    |
|-------------|--------------------------------------------------------------------------------------------------------------------------------------------------------------|
| P1          | TACCAAGCATGTCAGATTATCTACACTTAGTAGAAAATTATGGTAGCTCAAGA<br>GCCTGCCCAAATCTACACTTAGTAGAAAATTATGCCACG                                                             |
| P2          | CTAAGGTAGATAATCTGACATGCTTGGTAGCTCATTTTTTTCCTAGGGG<br>GATCTTTAAACATACGAACAGATC                                                                                |
| P3          | TCCCGCAGAAGGACATCTATCTACACTTAGTAGAAAATTAACCTCGGATGGT<br>TCCGTTCATAGATCTACACTTAGTAGAAAATTATGCCACG                                                             |
| P4          | CTAAGGTAGATAGATGTCCTTCTGCGGGAGCACGTTTTTTCCTAGGG<br>GGATCTTTAAACATACGAACAGATC                                                                                 |
| P5          | GCGGCAGCCC GAAGAAGAAGCGCAAAGTGTGATTAATTAATCCTGGGC<br>CATGAAGCTGTC                                                                                            |
| P6          | TTAATTAAGGCGCGCCCGGTCCGTTAGCTAATTAGGCCTAGGAAAAAAAA<br>ACGTGCTCCCGCAGAAGGACATCTATCTACACTTAGTAGAAAATTAACCTC<br>GGATGGTCCGTT CATAGATCTACACTTAGTAGAAAATTATGCCACG |
| P7          | CCTAATTAGCTAACGGACCGG                                                                                                                                        |
| P8          | TCTAGAGAGGGGCACGACCGGTCCGCTGACTGCTGACTGCAGCGGTCCCCA<br>ACCCTTAATAAATTCGTATAATGTATGCTATACGAAGTATTAGGTCCGGT<br>CCGGATCTAGTAACAT                                |
| P9          | TTAATTAATCACACTTTGCGCTTCTTCTT                                                                                                                                |
| P10         | CTGCAGTGCAGCGTGACC                                                                                                                                           |
| P11         | TTAATTAAGGCGCGCCCGGTCCGTTAGCTAATTAGGCCTAGGAAAAAAAA<br>AGACACCACAGTACCACCACCCGATCTACACTTAGTAGAAAATTAGGGGT<br>GGTGGTACTGTGGTGTCCATCTACACTTAGTAGAAAATTATGCCACG  |
| P12         | TTAATTAAGGCGCGCCCGGTCCGTTAGCTAATTAGGAAAAAAAAAGGCG<br>ATGTTGCAAGTACATCTGGATCTACACTTAGTAGAAAATTAGAATGTGATCCAT<br>TCTTAGTAATATCTACACTTAGTAGAAAATTATGCCACG       |
| P13         | TTAATTAAGGCGCGCCCGGTCCGTTAGCTAATTAGGAAAAAAAAAGACAC<br>CACAGTACCACCACCCGATCTACACTTAGTAGAAAATTAGGGGTGGTGGT<br>ACTGTGGTGTCCATCTACACTTAGTAGAAAATTATGCCACG        |

**Supplementary Table 3. Primers used for vector construction and vector component amplification.**

| <b>PCR Number</b> | <b>Vector Component</b>                                        | <b>29140 Primer Pairs (CCT9)</b> | <b>29141 Primer Pairs (CCT10)</b> | <b>29143 Primer Pairs (Gi1 / Gi2)</b> | <b>29144 Primer Pairs (CCT9 / CCT10)</b> |
|-------------------|----------------------------------------------------------------|----------------------------------|-----------------------------------|---------------------------------------|------------------------------------------|
| <b>PCR1-1</b>     | crRNA Cassette with promoter (PrOsU3) and terminator (tSoUbi4) | P6 and P5                        | P11 and P5                        | P1 and P5                             | P3 and P5                                |
| <b>PCR1-2</b>     | Extra PrOsU3 Promoter for crRNA                                | N/A                              | N/A                               | P2 and P12                            | P4 and P13                               |
| <b>PCR2</b>       | CRE / Axig1 / WUS Cassette                                     | P7 and P8                        | P7 and P8                         | P7 and P8                             | P7 and P8                                |

**Supplementary Table 4. Primer pairs used to amplify and assemble editing vectors.**

| <b>Component Name</b>            | <b>Cassette Number</b> | <b>Description</b>                                                                     |
|----------------------------------|------------------------|----------------------------------------------------------------------------------------|
| <b>PrSoUbi4</b>                  | 1                      | The constitutive sugarcane ubiquitin-4 promoter                                        |
| <b>cLbCas12a (formerly Cpf1)</b> | 1                      | Maize-codon optimized LbCas12a endonuclease                                            |
| <b>tSoUbi4</b>                   | 1                      | Terminator from the sugarcane ubiquitin 4 gene                                         |
| <b>PrOsU3 + crRNAs</b>           | 2                      | Rice U3 promoter for pol III dependent transcription of non-coding RNAs                |
| <b>LoxP</b>                      | 3 & 4                  | Cre-mediated recombination site from Escherichia phage 1                               |
| <b>PrZmHSP12</b>                 | 3                      | Heat shock inducible promoter from maize                                               |
| <b>cCre</b>                      | 3                      | The coding sequence of Cyclization Recombination protein (CRE) from bacterial phage P1 |
| <b>tNOS</b>                      | 3 & 4                  | Synthetic Nopaline synthetase terminator                                               |
| <b>eFMV</b>                      | 4                      | Enhancer derived from Figwort Mosaic Virus                                             |
| <b>ePCISV</b>                    | 4                      | Transcriptional enhancer from Peanut Chlorotic Streak Virus                            |
| <b>eMMV</b>                      | 4                      | Transcriptional enhancer from Mirabillis Mosaic Virus (MMV)                            |
| <b>PrZmAxig1</b>                 | 4                      | An auxin inducible maize promoter                                                      |
| <b>cZmWUS</b>                    | 4                      | Maize WUSCHEL gene                                                                     |
| <b>PrUbi1</b>                    | 5                      | Maize Ubiquitin 1 promoter                                                             |
| <b>cPMI</b>                      | 5                      | Synthetic phosphomannose isomerase gene                                                |
| <b>tUbi1</b>                     | 5                      | Maize Ubiquitin 1 terminator                                                           |

**Supplementary Table 5. Components and the cassettes of the editing vector they were assembled into.**

| Target           | crRNA | crRNA sequence (5' – 3')       |
|------------------|-------|--------------------------------|
| CCT9_Exon1       | 1     | TTTC CCGGGATGTGGCACCCAGCAACAC  |
| CCT9_Exon2       | 2     | TTTG CTATGAACGGAACCATCCGAGGT   |
| CCT9_Exon2       | 3     | TTTC AGATGTCCTTCTGCGGGAGCACG   |
| CCT10_Exon1      | 4     | TTTG GGACACCACAGTACCAACACCCC   |
| CCT10_Exon1      | 5     | TTTC ACCCGTTTGGGACACCACAGTAC   |
| CCT10_Exon1      | 6     | TTTC CGGGGTGGTGGTACTGTGGTGTC   |
| CCT10_Exon1      | 7     | TTTG AGCTGGACGCCACGCTGGGCCTC   |
| CCT10_Exon1      | 8     | TTTG CCGCGCGGTGCCGAGGCCAGCG    |
| CCT10_Exon1      | 9     | TTTG TGTGCACACACAGCGGATATACC   |
| CCT10_Exon2      | 10    | TTTG CAGCTCATTGCCGTCGTCGATCA   |
| CCT10_Exon2      | 11    | TTTC ACCCTGGGTCTCACCTGCGCATA   |
| CCT10_Exon2      | 12    | TTTG AGAAGCAGATAAGATATGCATCC   |
| Gigantea1_Exon1  | 13    | TTTA CGGCTGTCTGTTCCGGGCTACTG   |
| Gigantea1_Exon1  | 14    | TTTC GCCCGTTGATGATTACGGCTGT    |
| Gigantea1_Exon1  | 15    | TTTC TGTGCGGGTTTCGCCCGTTGATG   |
| Gigantea1_Exon2  | 16    | TTTC TAGTTTCTTGGGCAGGCTCTTGA   |
| Gigantea1_Exon2  | 17    | TTTC TTGGGCAGGCTCTTGAGCTACCA   |
| Gigantea1_Exon2  | 18    | TTTG AATCTGACATGCTTGGTAGCTCA   |
| Gigantea1_Exon3  | 19    | TTTG GCCATTCTTGTTTGAAGGCACAA   |
| Gigantea1_Exon3  | 20    | TTTG AAGGCACAAATTTGGCATATGT    |
| Gigantea1_Exon3  | 21    | TTTG TGCCTTCAAACAAGAATGGCCAA   |
| Gigantea1_Exon3  | 22    | TTTA CAGCTGACACCGATCAATTCCCT   |
| Gigantea1_Exon8  | 23    | TTTA ACAGCAGCAGCTGTTCCCTGCGCT  |
| Gigantea1_Exon10 | 24    | TTTC ATTACTAAGAATGGATCACATTC   |
| Gigantea1_Exon10 | 25    | TTTC GTCGGTCCAGGCCATGCCTTAAT   |
| Gigantea1_Exon10 | 26    | TTTC CCAGATGTACTIONGCAACATCGCC |

**Supplementary Table 6. crRNA screened in etiolated maize leaf protoplast and measured for editing efficiency by T7E1.** Target gene and exon and sequence provided. Selected gRNA for stable experiment are highlighted by red text.

| <b>Gene</b>                | <b>crRNA Name</b> | <b>crRNA Sequence</b>   | <b>Exon Target</b>                     |
|----------------------------|-------------------|-------------------------|----------------------------------------|
| <b>CCT9</b>                | CCT9-g1           | CTATGAACGGAACCATCCGAGGT | CCT9-Exon2                             |
| <b>CCT9</b>                | CCT9-g2           | AGATGTCCTTCTGCGGGAGCACG | CCT9-Exon2                             |
| <b>CCT10</b>               | CCT10-g1          | GGACACCACAGTACCACCACCCC | CCT10-Exon1                            |
| <b>CCT10</b>               | CCT10-g2          | CGGGGTGGTGGTACTGTGGTGTC | CCT10-Exon1                            |
| <b>Gigantea1/Gigantea2</b> | Gi1/Gi2-g1        | TTGGGCAGGCTCTTGAGCTACCA | Gi1-Exon2<br>Gi2-Exon1                 |
| <b>Gigantea1/Gigantea2</b> | Gi1/Gi2-g2        | AATCTGACATGCTTGGTAGCTCA | Gi1-Exon2<br>Gi2-Exon1                 |
| <b>Gigantea1</b>           | Gi1/Gi2-g3        | ATTACTAAGAATGGATCACATTC | Gi1-Exon11 (Does not target Gigantea2) |
| <b>Gigantea1/Gigantea2</b> | Gi1/Gi2-g4        | CCAGATGTACTTGCAACATCGCC | Gi1-Exon11<br>Gi2-Exon10               |

**Supplementary Table 7. Gene targets with their associated crRNA used for transformation experiments. crRNA sequences and target exons.**

| <b>Gene</b>                    | <b>Forward Primer</b>       | <b>Reverse Primer</b>   | <b>Probe</b>                        |
|--------------------------------|-----------------------------|-------------------------|-------------------------------------|
| <b>ZCN8</b>                    | CACTGGATGGTGAC<br>AGATATTCC | GCCAAGTTGACG<br>GAACAGC | ATGAGAGGCCGGACCC<br>AAGATCTG        |
| <b>ZCN7</b>                    | CACTGGATGGTGAC<br>AGATATTCC | CGTACCCCTGCC<br>AAGTTGG | ATGAGAGACCAGATCCA<br>AGATCTGGTATCCA |
| <b>ZMM4</b>                    | TCAGGCACGTCGCT<br>TCAG      | GCCTCTCGCAAG<br>CAACAAG | CGCCGCCGACAGCAGC<br>TATAAACTAG      |
| <b>Zm-EF1a<br/>(reference)</b> | GCGCCGTCACCGTA<br>TCC       | GCTCGTCGGGCG<br>TCAGTA  | ATCAGAGGCGAGCAGAA<br>ACCACACCAC     |

**Supplementary Table 8. Primer sequences for qRT-PCR amplification of *ZCN8*, *ZCN7*, and *ZMM4*.**

**Supplementary Sequence File 1. Sequences for *ZmCCT9* (Zm00001eb391230), *ZmCCT10* (Zm00001eb418700), and *ZmGi1* (Zm00001eb337600) / *ZmGi2* from the tropical inbred NPB6195 used for cRNA design.**
